# Supplementary material for: Köppen versus the computer: comparing Köppen-Geiger and multivariate regression tree climate classifications in terms of climate homogeneity
Source: Copernicus journal article supplement (doi:10.5194/hess-16-217-2012), 2012-01-24
Supplement: Supplementary file 1 [file hess-16-217-2012-supplement.zip]

## Supplement: Walter-Lieth diagrams for MRT climate classes

### References

Guijarro, J. A.: climatol: some tools for climatology: series homogenization, plus windrose and Walter & Lieth diagrams, URL <http://CRAN.R-project.org/package=climatol>, R package version 2.0, 2011.

Heinrich, W. and Helmut, L.: Klimadiagramm-Weltatlas, VEB Gustav Fischer Verlag, Jena, 1967.

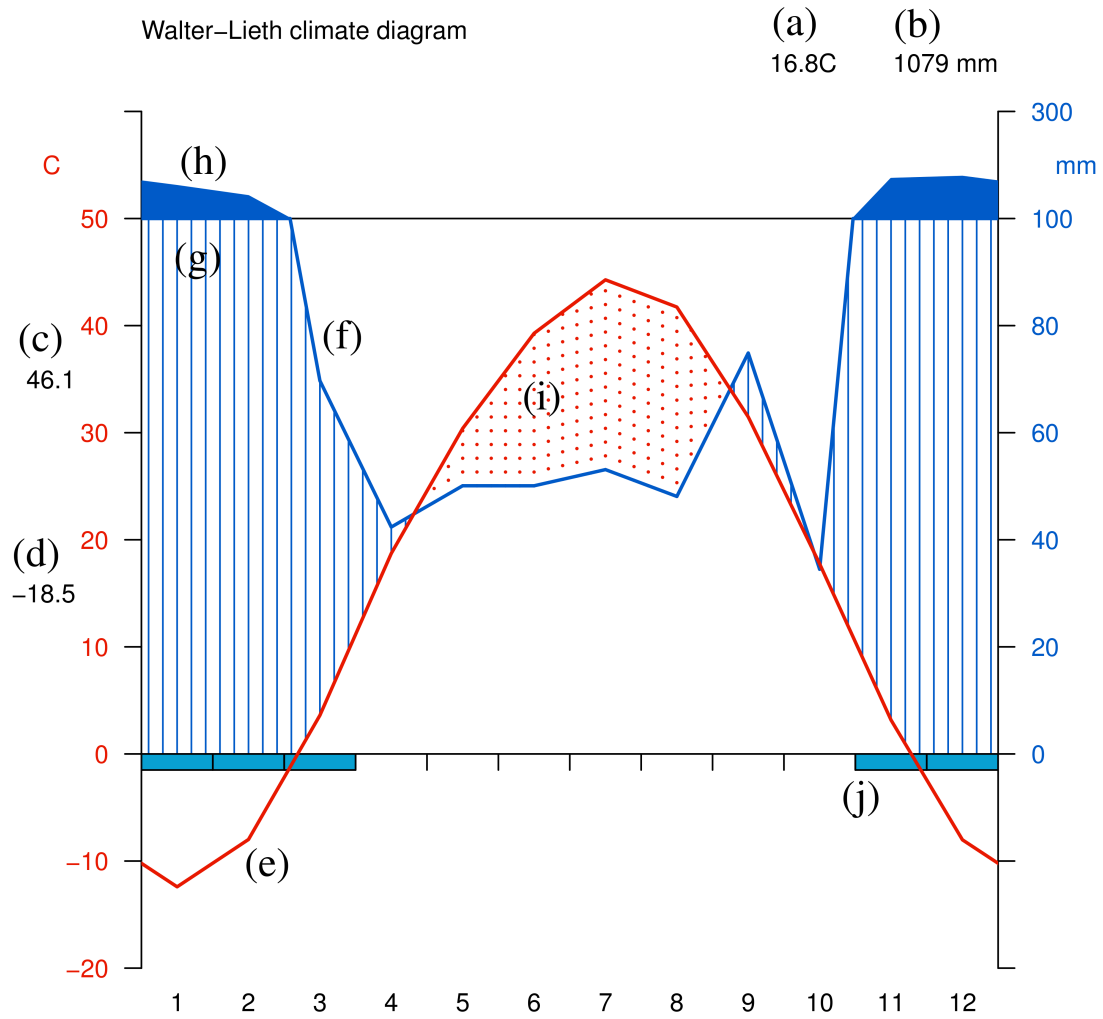

**Fig. S1.** Sample Walter–Lieth climate diagram (Heinrich and Helmut, 1967; Guijarro, 2011). (a) mean annual temperature; (b) mean annual precipitation; (c) mean maximum temperature of warmest month; (d) mean minimum temperature of coldest month; (e) monthly mean temperature series; (f) monthly precipitation series; (g) period of precipitation excess; (h) period of monthly precipitation > 100 mm; (i) period of precipitation deficit; (j) period of monthly minimum temperature < 0 deg. C.

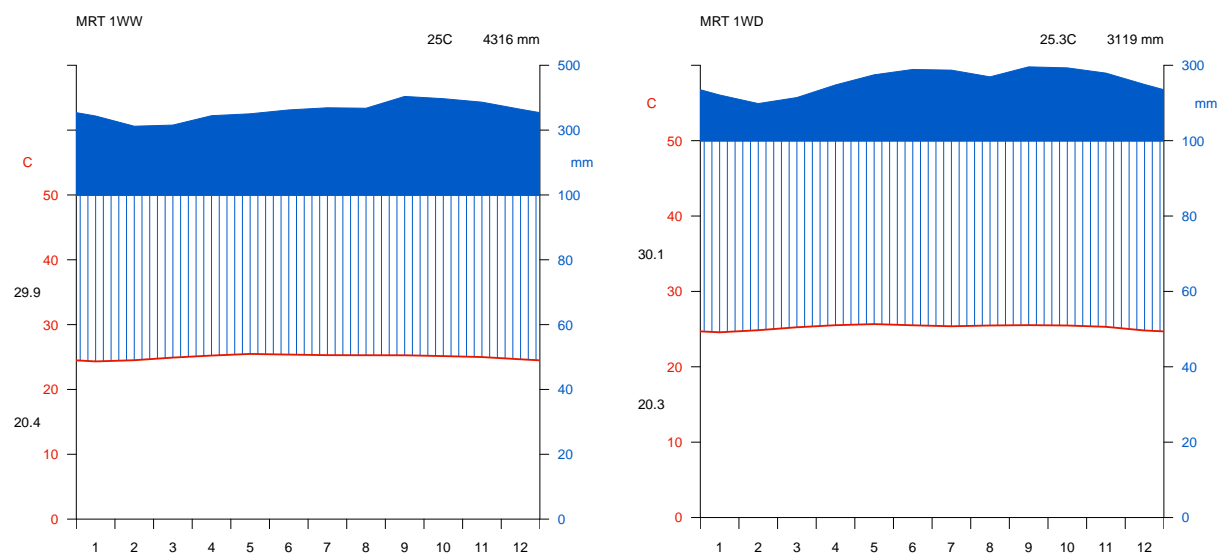

**Fig. S2.** Climate diagrams for MRT climate sub-class 1W.

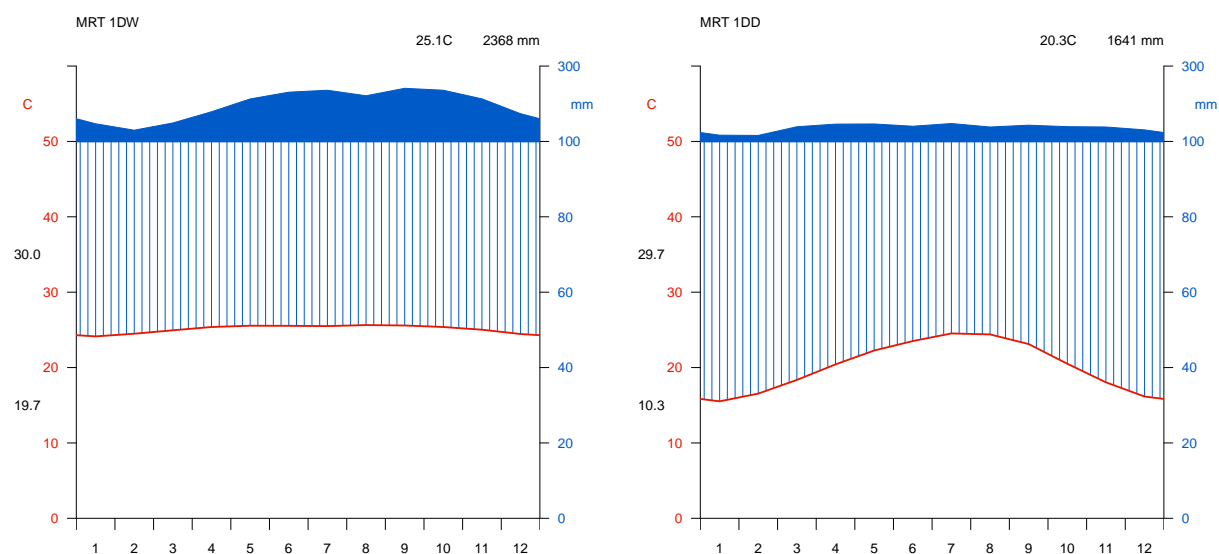

**Fig. S3.** Climate diagrams for MRT climate sub-class 1D.

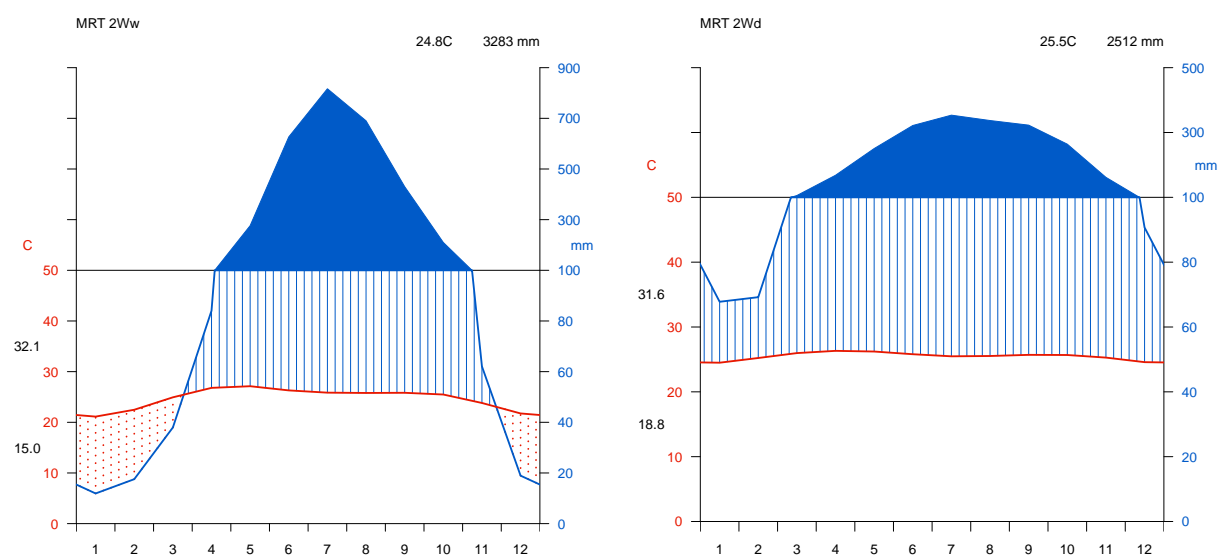

**Fig. S4.** Climate diagrams for MRT climate sub-classes under class 2W.

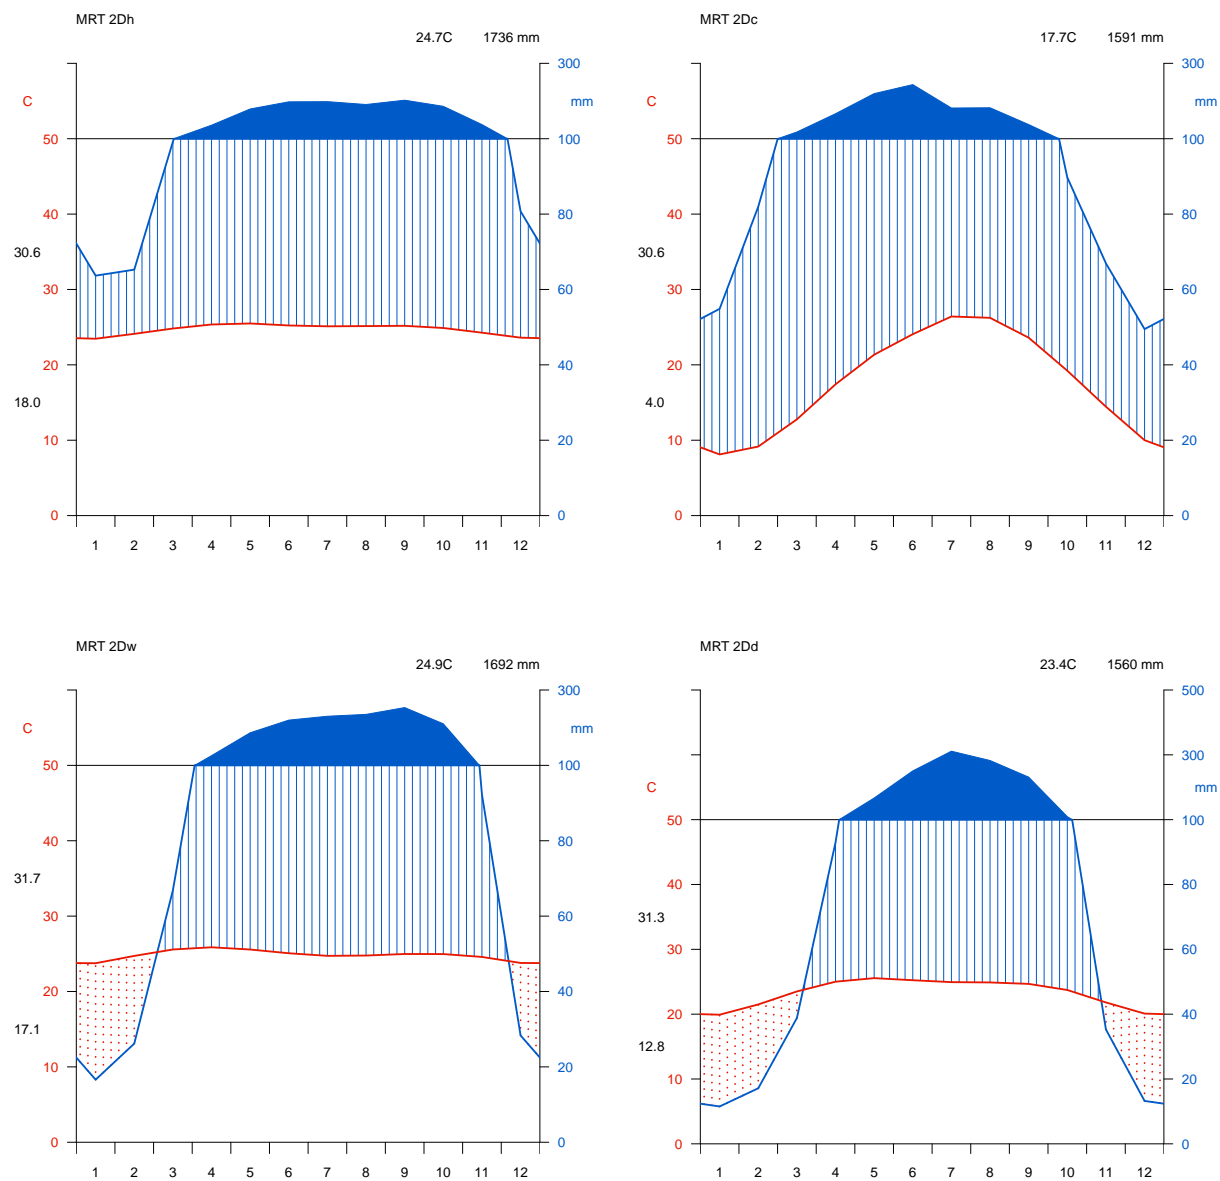

**Fig. S5.** Climate diagrams for MRT climate sub-classes under class 2D.

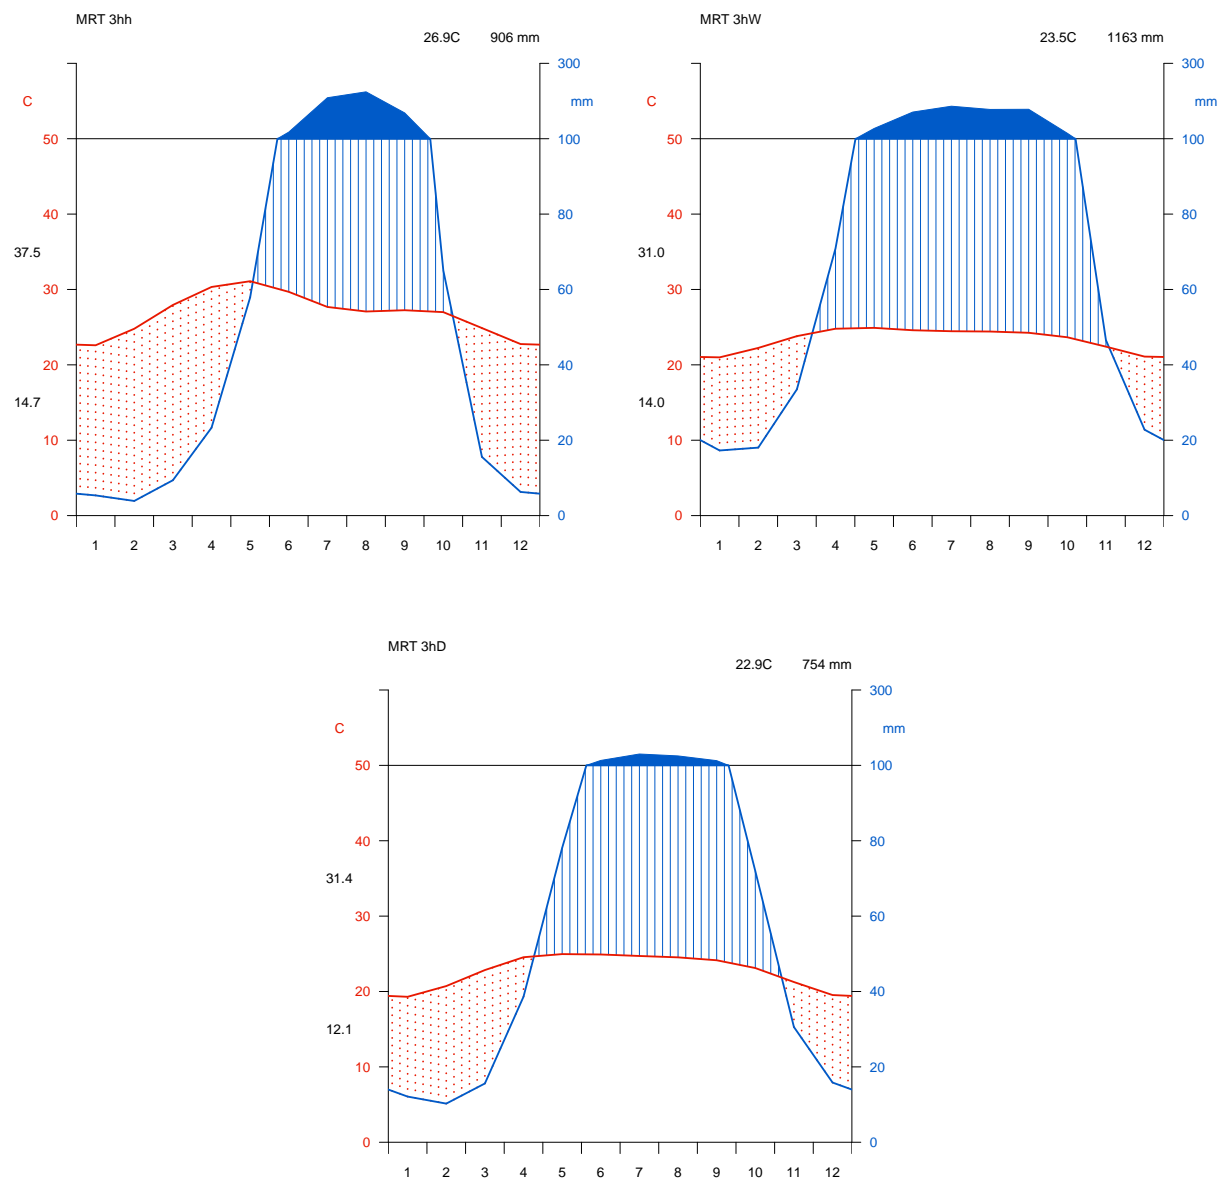

**Fig. S6.** Climate diagrams for MRT climate sub-classes under class 3h.

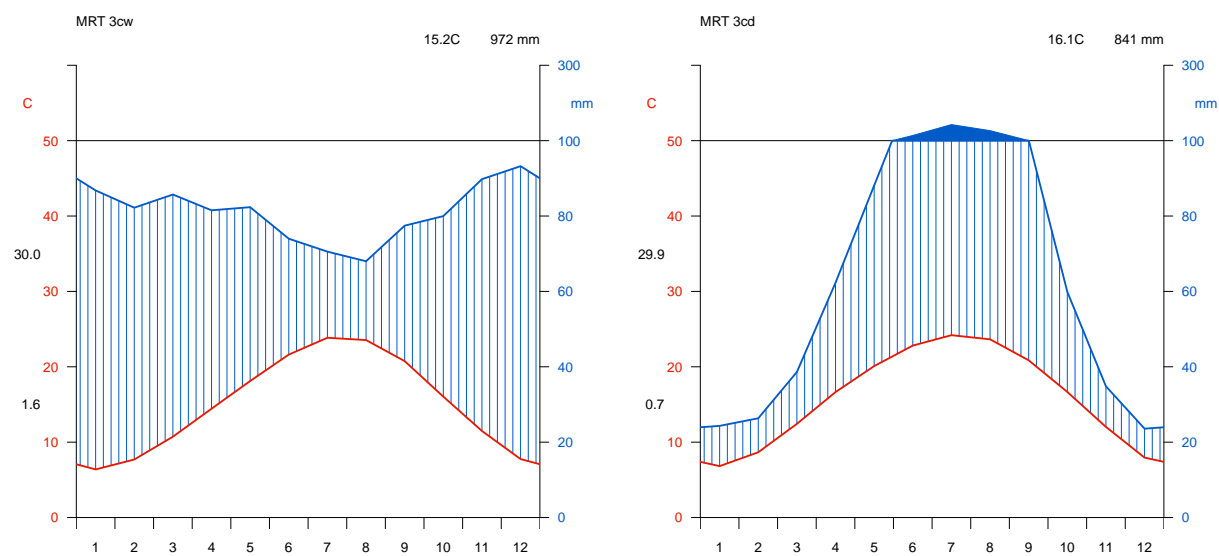

**Fig. S7.** Climate diagrams for MRT climate sub-classes under class 3c.

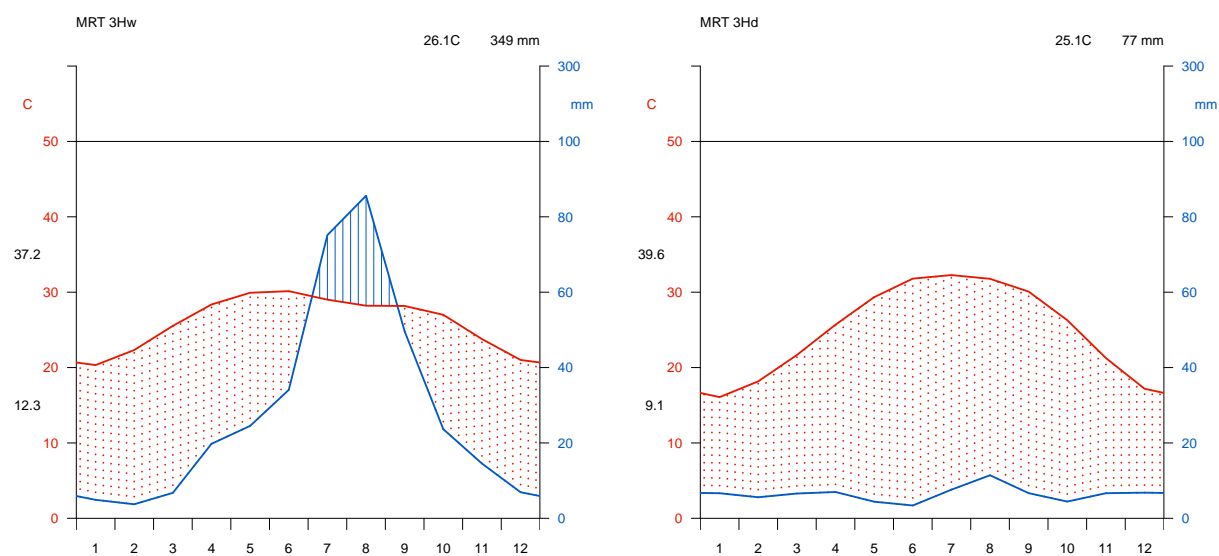

**Fig. S8.** Climate diagrams for MRT climate sub-classes under class 3H.

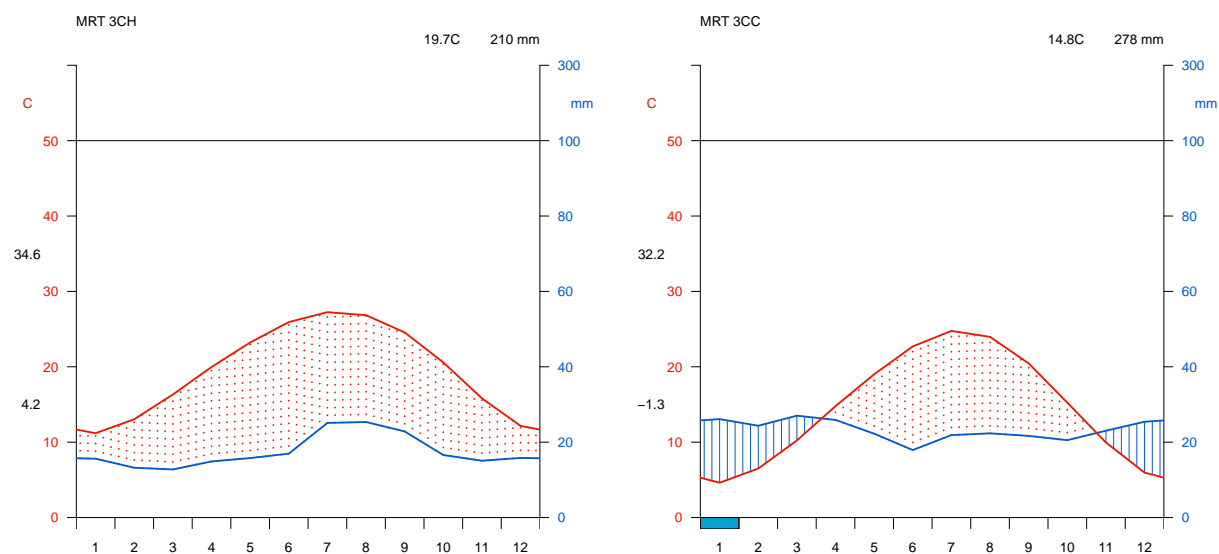

**Fig. S9.** Climate diagrams for MRT climate sub-classes under class 3C.

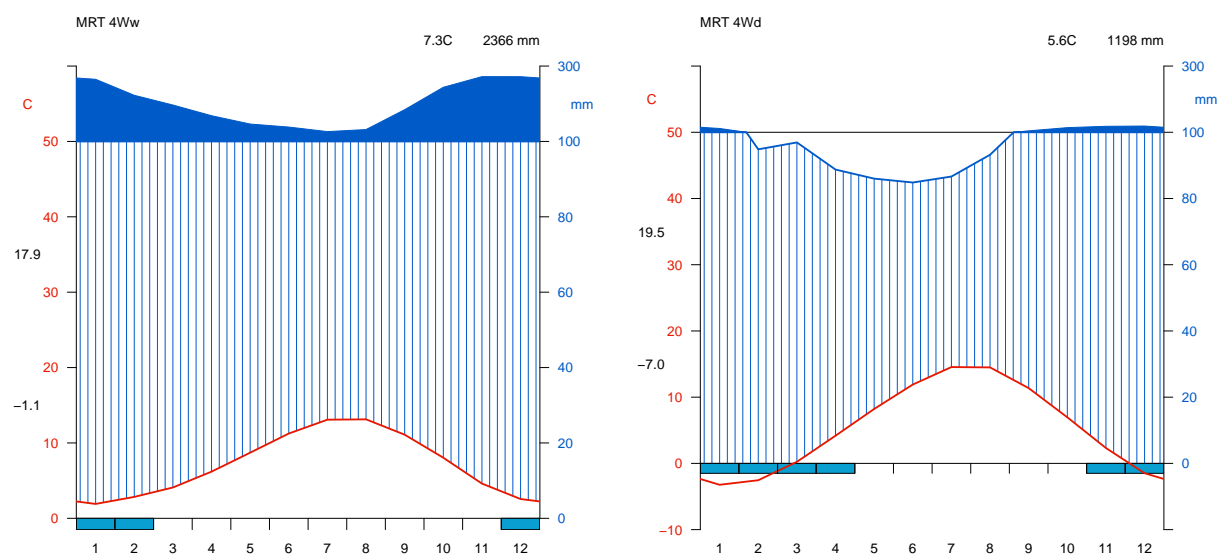

**Fig. S10.** Climate diagrams for MRT climate sub-classes under class 4W.



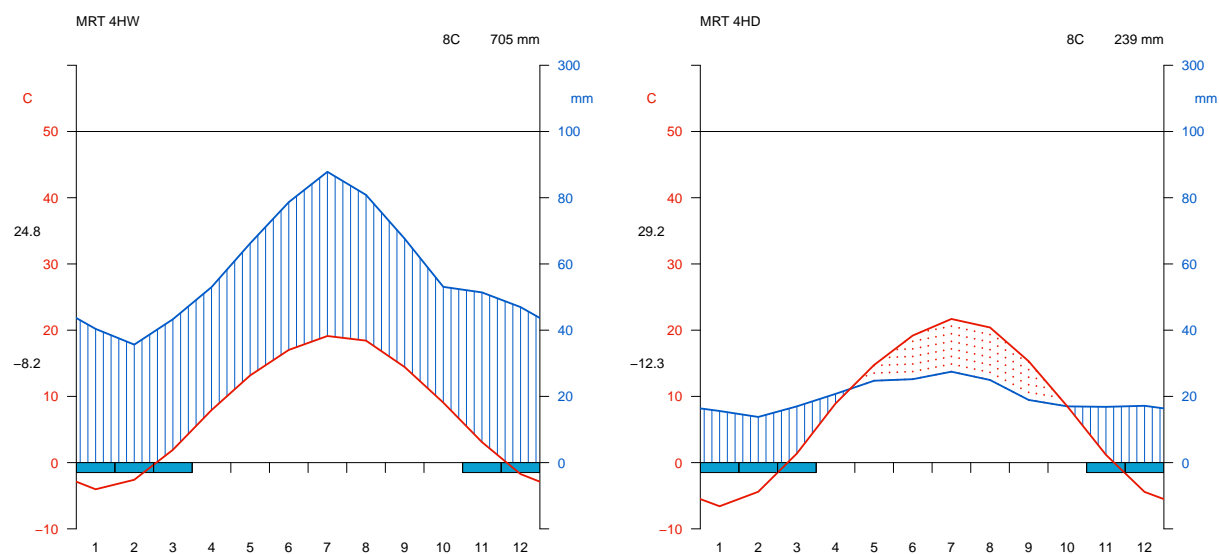

**Fig. S11.** Climate diagrams for MRT climate sub-classes under class 4H.

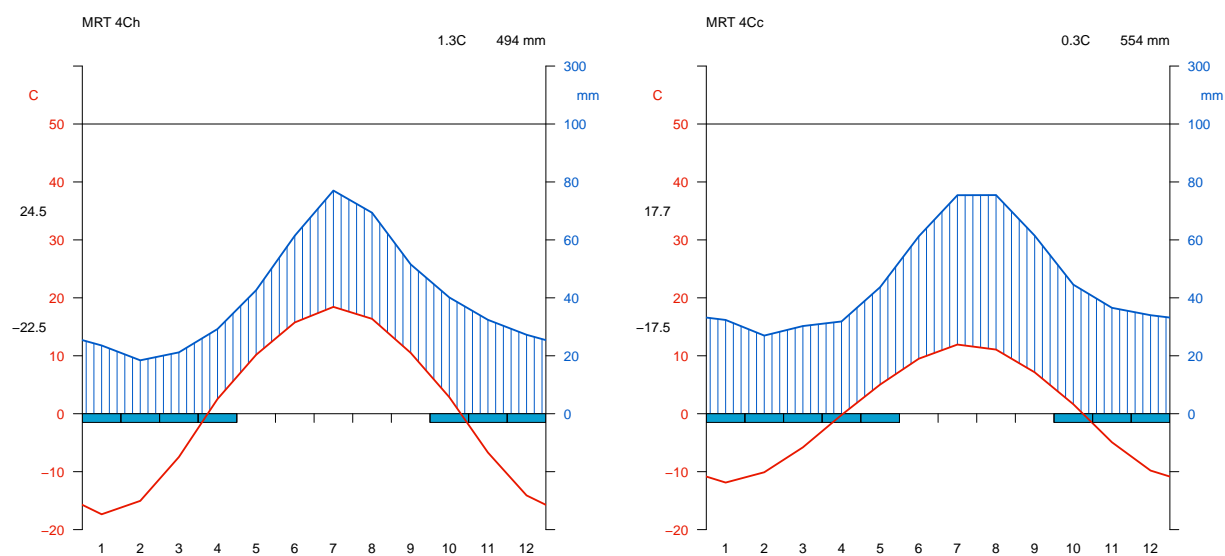

**Fig. S12.** Climate diagrams for MRT climate sub-classes under class 4C.

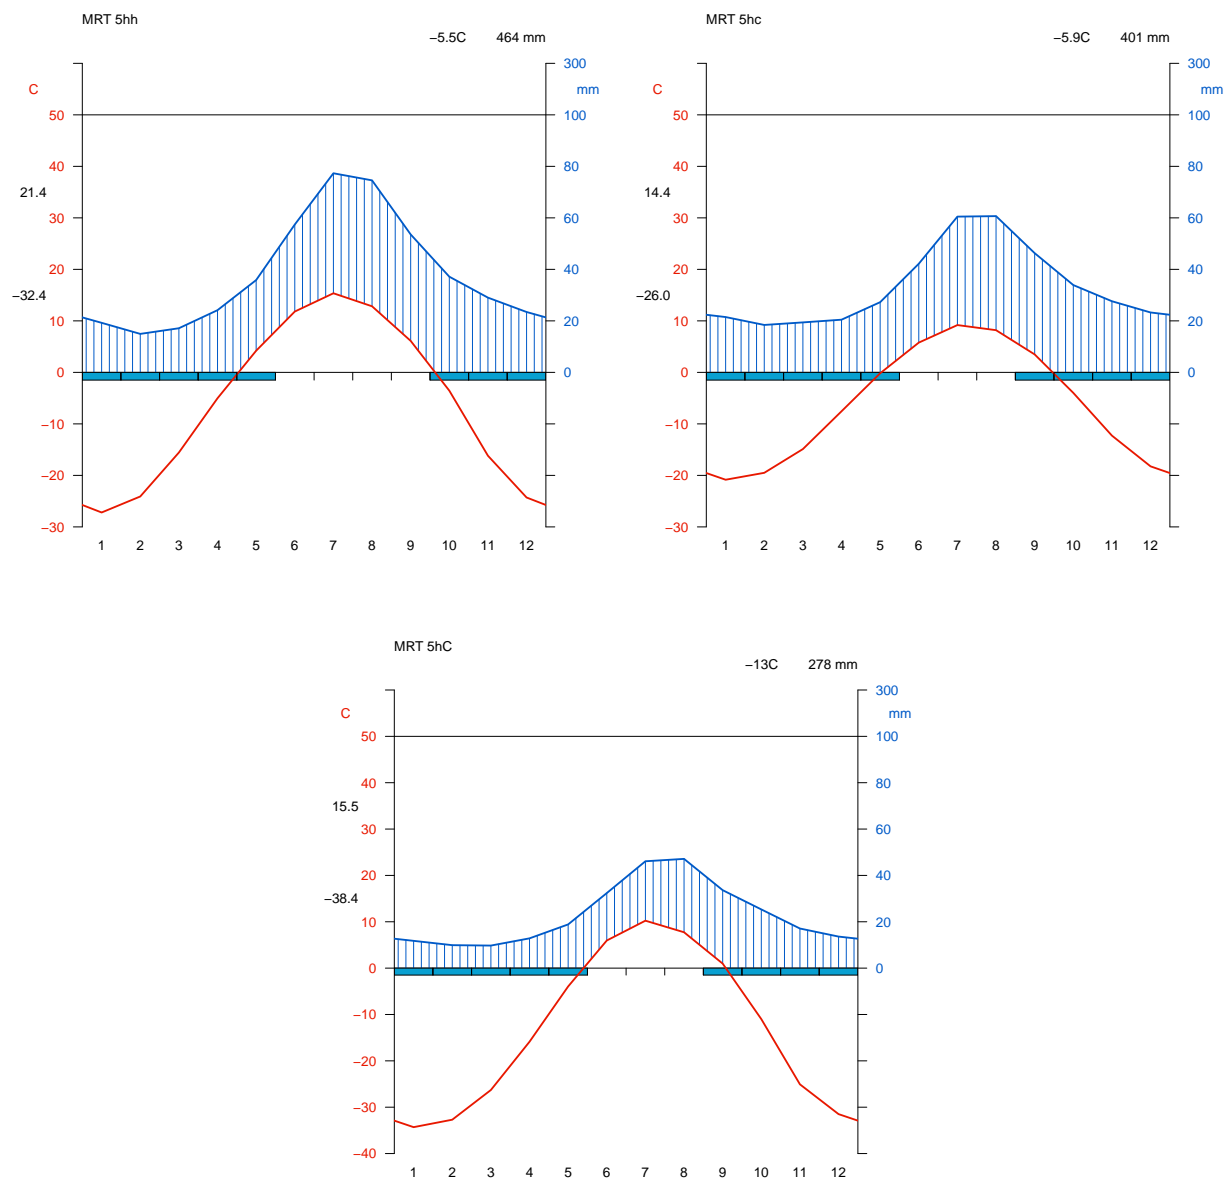

**Fig. S13.** Climate diagrams for MRT climate sub-classes under class 5h.

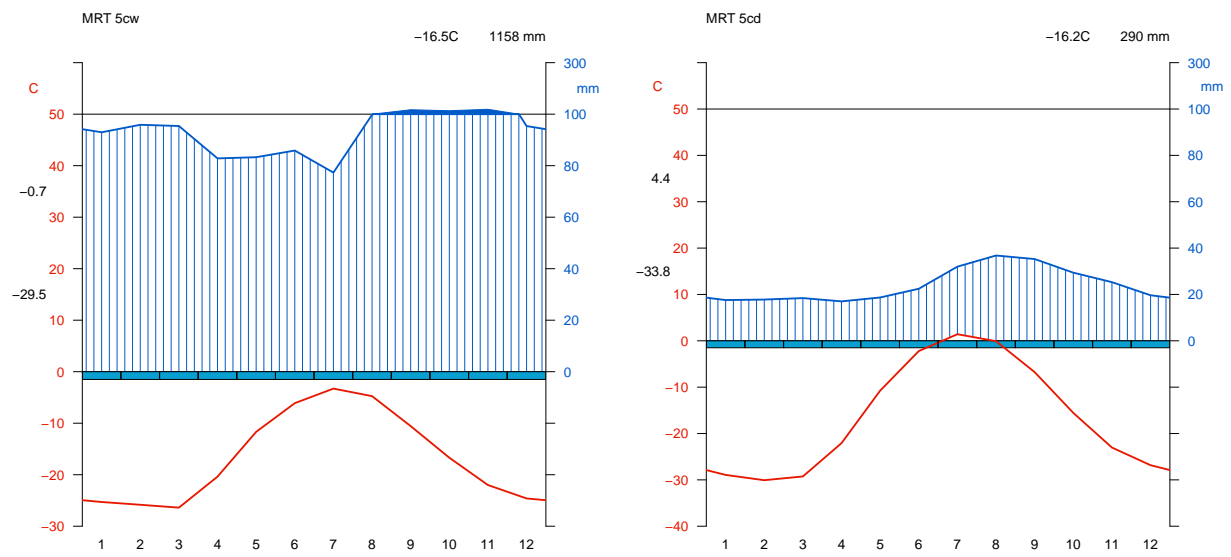

**Fig. S14.** Climate diagrams for MRT climate sub-classes under class 5c.
